# Supplementary material
Source: publisher figshare collection journal article supplement (https://tandf.figshare.com/articles/dataset/_/14748137)
Supplement: Supplementary file 1 [file 1]

## Sheet: allGenes_accTable.txt
	APOB (exon 26)	BDNF	RBP3=IRBP	MT-ATP6	MT-ATP8	MT-CO1	MT-CO2	MT-CO3	MT-CYB	MT-ND1	MT-ND2	MT-ND3	MT-ND4	MT-ND4L	MT-ND5	MT-ND6
Ailurus fulgens	AB193430	U56639	AY525045	AB291074	AB291074	AB291074	AB291074	AB291074	AB291074	AB291074	AB291074	AB291074	AB291074	AB291074	AB291074	AB291074
Canis latrans	KT447831	DQ240360	KT447969	DQ480511	DQ480511	DQ480511	DQ480511	DQ480511	DQ480511	DQ480511	DQ480511	DQ480511	DQ480511	DQ480511	DQ480511	DQ480511
Civettictis civetta	GU930893	GU930989	AY170078	NC_033378	NC_033378	NC_033378	NC_033378	NC_033378	NC_033378	NC_033378	NC_033378	NC_033378	NC_033378	NC_033378	NC_033378	NC_033378
Gulo gulo	AB193407	EF987635	AB082962	AM711901	AM711901	AM711901	AM711901	AM711901	AM711901	AM711901	AM711901	AM711901	AM711901	AM711901	AM711901	AM711901
Herpestes edwardsii			AY170080						DQ519053		AY170050
Hyaena hyaena	AY928689	GU930979	DQ267570	NC_020669	NC_020669	NC_020669	NC_020669	NC_020669	NC_020669	NC_020669	NC_020669	NC_020669	NC_020669	NC_020669	NC_020669	NC_020669
Mephitis mephitis	AB193406	GU930995	AB109331	NC_020648	NC_020648	NC_020648	NC_020648	NC_020648	NC_020648	NC_020648	NC_020648	NC_020648	NC_020648	NC_020648	NC_020648	NC_020648
Nandinia binotata	AF548420	GU930992	AY170083	NC_024567	NC_024567	NC_024567	NC_024567	NC_024567	NC_024567	NC_024567	NC_024567	NC_024567	NC_024567	NC_024567	NC_024567	NC_024567
Panthera leo	AB193432	VOCV01000099	AY525036	NC_028302	NC_028302	NC_028302	NC_028302	NC_028302	NC_028302	NC_028302	NC_028302	NC_028302	NC_028302	NC_028302	NC_028302	NC_028302
Procyon lotor	AB193427	AF003188	AY525029	AB297804	AB297804	AB297804	AB297804	AB297804	AB297804	AB297804	AB297804	AB297804	AB297804	AB297804	AB297804	AB297804
Puma concolor	PSOM01139749	QAVW01000425	DQ205911	NC_016470	NC_016470	NC_016470	NC_016470	NC_016470	NC_016470	NC_016470	NC_016470	NC_016470	NC_016470	NC_016470	NC_016470	NC_016470
Ursus americanus	GU930905	DQ240386	AY303837	AF303109	AF303109	AF303109	AF303109	AF303109	AF303109	AF303109	AF303109	AF303109	AF303109	AF303109	AF303109	AF303109
Zalophus californianus	AF548424	GU931006	AY525043	AM181017	AM181017	AM181017	AM181017	AM181017	AM181017	AM181017	AM181017	AM181017	AM181017	AM181017	AM181017	AM181017
Erinaceus europaeus	JN414024.1	AMDU01198131	XM_007534910.1	NC_002080	NC_002080	NC_002080	NC_002080	NC_002080	NC_002080	NC_002080	NC_002080	NC_002080	NC_002080	NC_002080	NC_002080	NC_002080
Echinosorex gymnura		AY986746.1		NC_002808	NC_002808	NC_002808	NC_002808	NC_002808	NC_002808	NC_002808	NC_002808	NC_002808	NC_002808	NC_002808	NC_002808	NC_002808
